# Supplementary material for: Human Papillomavirus Genotype Distribution among Cervical Cancer Patients prior to Brazilian National HPV Immunization Program
Source: Hindawi journal article supplement (doi:10.1155/2017/1645074), 2017-01-01
Supplement: f1 [file 1645074.f1.pdf]

**Supplementary Table 1 – Distribution of HPV type-specific combinations found in multiple infections in tumor samples of women with cervical cancer in Rio de Janeiro and Pará, Brazil**

| <b>HPV types in multiple infections</b>  | <b>Rio de Janeiro</b> | <b>Pará</b> |
|------------------------------------------|-----------------------|-------------|
| HPV16, HPV18                             | 4                     | 3           |
| HPV16, HPV33                             | 0                     | 2           |
| HPV16, HPV45                             | 2                     | 2           |
| HPV16, HPV39                             | 1                     | 0           |
| HPV16, HPV42                             | 1                     | 0           |
| HPV16, HPV58                             | 0                     | 1           |
| HPV16, HPV18, HPV31                      | 1                     | 2           |
| HPV16, HPV18, HPV33                      | 0                     | 1           |
| HPV16, HPV18, HPV35                      | 0                     | 1           |
| HPV16, HPV33, HPV45                      | 0                     | 2           |
| HPV31, HPV35, HPV39                      | 1                     | 0           |
| HPV16, HPV18, HPV45                      | 1                     | 0           |
| HPV16, HPV18, HPV52                      | 1                     | 0           |
| HPV16, HPV45, HPV58                      | 0                     | 1           |
| HPV16, HPV18, HPV31, HPV33               | 1                     | 1           |
| HPV16, HPV18, HPV33, HPV45               | 1                     | 0           |
| HPV16, HPV18, HPV33, HPV52               | 0                     | 2           |
| HPV16, HPV18, HPV33, HPV54               | 1                     | 0           |
| HPV16, HPV18, HPV54, HPV61               | 1                     | 0           |
| HPV16, HPV18, HPV56, HPV82               | 0                     | 1           |
| HPV16, HPV33, HPV58, HPV67               | 0                     | 1           |
| HPV16, HPV45, HPV58, HPV54               | 1                     | 0           |
| HPV16, HPV18, HPV31, HPV33, HPV39        | 1                     | 0           |
| HPV16, HPV31, HPV33, HPV39, HPV68        | 1                     | 0           |
| HPV16, HPV18, HPV31, HPV33, HPV35, HPV52 | 1                     | 0           |
| HPV16, HPV18, HPV33, HPV35, HPV45, HPV52 | 0                     | 1           |
| HPV16, HPV-X*                            | 0                     | 6           |
| <b>TOTAL</b>                             | <b>20</b>             | <b>27</b>   |

\*HPV-X: HPV DNA not identified

**Supplementary Table 2: Frequencies of cases of cervical cancer with a single infection of selected HPV type by age groups and location (Rio de Janeiro and Pará), Brazil**

| Age (years)                 | Population in each age group (N) |      | HPV 16         |      |       |      | HPV 18         |      |       |      | Alpha-7        |      |       |      | Alpha-9        |      |       |      |
|-----------------------------|----------------------------------|------|----------------|------|-------|------|----------------|------|-------|------|----------------|------|-------|------|----------------|------|-------|------|
|                             | Rio de Janeiro                   | Pará | Rio de Janeiro |      | Pará  |      | Rio de Janeiro |      | Pará  |      | Rio de Janeiro |      | Pará  |      | Rio de Janeiro |      | Pará  |      |
|                             |                                  |      | n              | %    | n     | %    | n              | %    | n     | %    | n              | %    | n     | %    | n              | %    |       |      |
|                             |                                  |      |                |      |       |      |                |      |       |      |                |      |       |      |                |      |       |      |
| 18 to 34                    | 78                               | 72   | 54             | 69.2 | 51    | 70.8 | 10             | 12.8 | 9     | 12.5 | 15             | 19.2 | 14    | 19.4 | 59             | 75.6 | 56    | 77.8 |
| 35 to 44                    | 148                              | 152  | 95             | 64.2 | 108   | 71.1 | 27             | 18.2 | 18    | 11.8 | 38             | 25.7 | 25    | 16.5 | 100            | 67.6 | 125   | 82.2 |
| 45 to 54                    | 159                              | 145  | 104            | 65.4 | 97    | 66.9 | 20             | 12.6 | 11    | 7.6  | 35             | 22.0 | 23    | 15.9 | 117            | 73.6 | 110   | 75.9 |
| 55 to 64                    | 111                              | 106  | 72             | 64.9 | 67    | 63.2 | 12             | 10.8 | 10    | 9.4  | 23             | 20.7 | 15    | 14.2 | 85             | 76.6 | 82    | 77.4 |
| 65 and older                | 74                               | 91   | 48             | 64.9 | 48    | 52.8 | 7              | 9.5  | 10    | 11.0 | 10             | 13.5 | 17    | 18.7 | 57             | 77.0 | 66    | 72.5 |
| <i>p value</i> <sup>a</sup> |                                  |      | 0.960          |      | 0.042 |      | 0.313          |      | 0.724 |      | 0.326          |      | 0.874 |      | 0.427          |      | 0.481 |      |

Alpha-7: HPV 18, 39, 45, 59, 70, 68, 85. Alpha-9: HPV 16, 31, 33, 35, 52, 58, 11, 67

<sup>a</sup> Chi-squared test
